# Supplementary material for: Hosomi–Sakurai reactions of silacyclic allyl silanes
Source: Royal Society of Chemistry journal article supplement (doi:10.1039/b602642g), 2006-01-01
Supplement: b602642g.pdf [file b602642g.pdf]

# Supplementary Material (ESI) for Chemical Communications  
# This journal is (c) The Royal Society of Chemistry 2006

## Supporting Information

General procedure

### Stage 1

A solution of silacycle (0.35g, 1.1mmol) in dichloromethane (35ml) was treated with benzaldehyde dimethylacetal (0.3ml, 2.2mmol) and cooled to 0 °C. The solution was then treated with  $\text{BF}_3 \cdot \text{Et}_2\text{O}$  ([0.5M] in DCM, 2.2ml, 1.1mmol) and reacted over 5h. The reaction mixture was then poured into  $\text{NH}_4\text{Cl}$  and extracted with dichloromethane (3 x 15ml). The combined organic layers were dried over  $\text{MgSO}_4$ , filtered, concentrated and dried *in vacuo*.

### Stage 2

The concentrated organic material was then redissolved in MeOH:THF (10ml, 1:1) was treated with  $\text{KHCO}_3$  (0.35g, 3.3mmol) and a 35% w/w solution of  $\text{H}_2\text{O}_2$  (1.3ml, 13mmol) at room temperature. The reaction mixture was then heated at reflux over 5h, at which point the mixture was poured into  $\text{Na}_2\text{S}_2\text{O}_3$  and extracted with EtOAc (3 x 15ml). The combined organic layers were dried over  $\text{MgSO}_4$ , filtered, concentrated and dried *in vacuo*. Flash chromatography yielded the title compounds.

# Supplementary Material (ESI) for Chemical Communications  
# This journal is (c) The Royal Society of Chemistry 2006

**Entry 1, Table 1**  
**<sup>1</sup>H & <sup>13</sup>C Spectra**

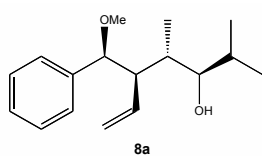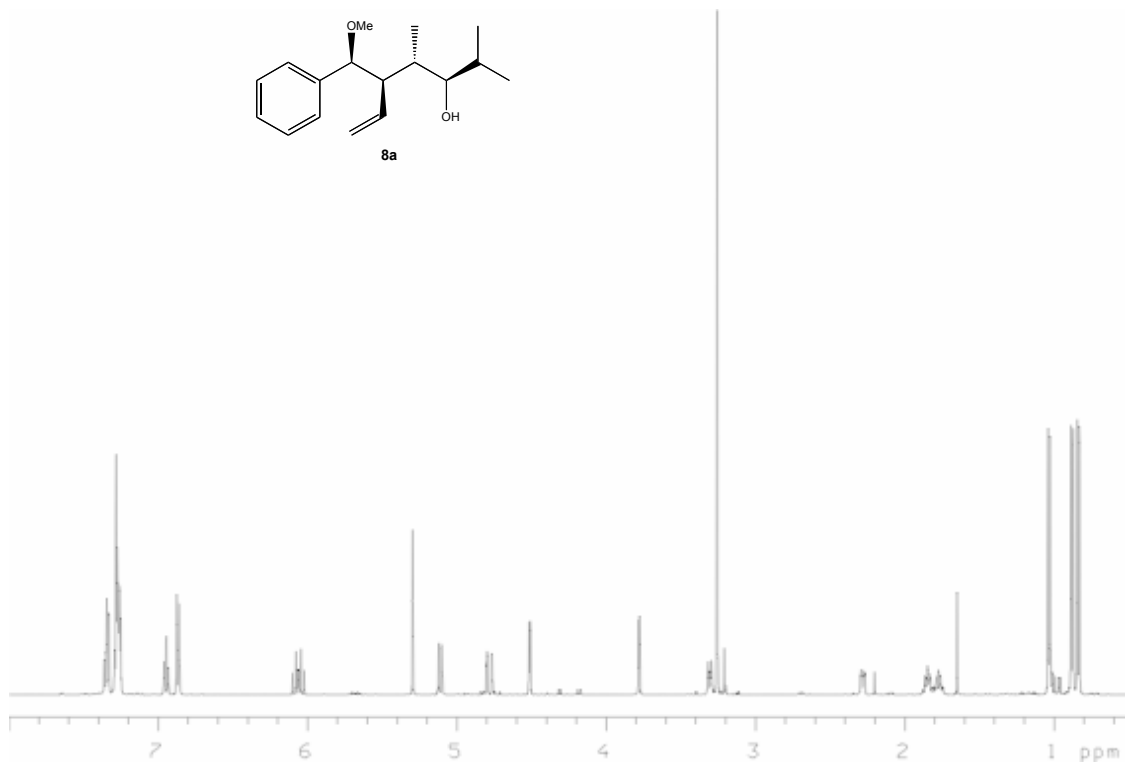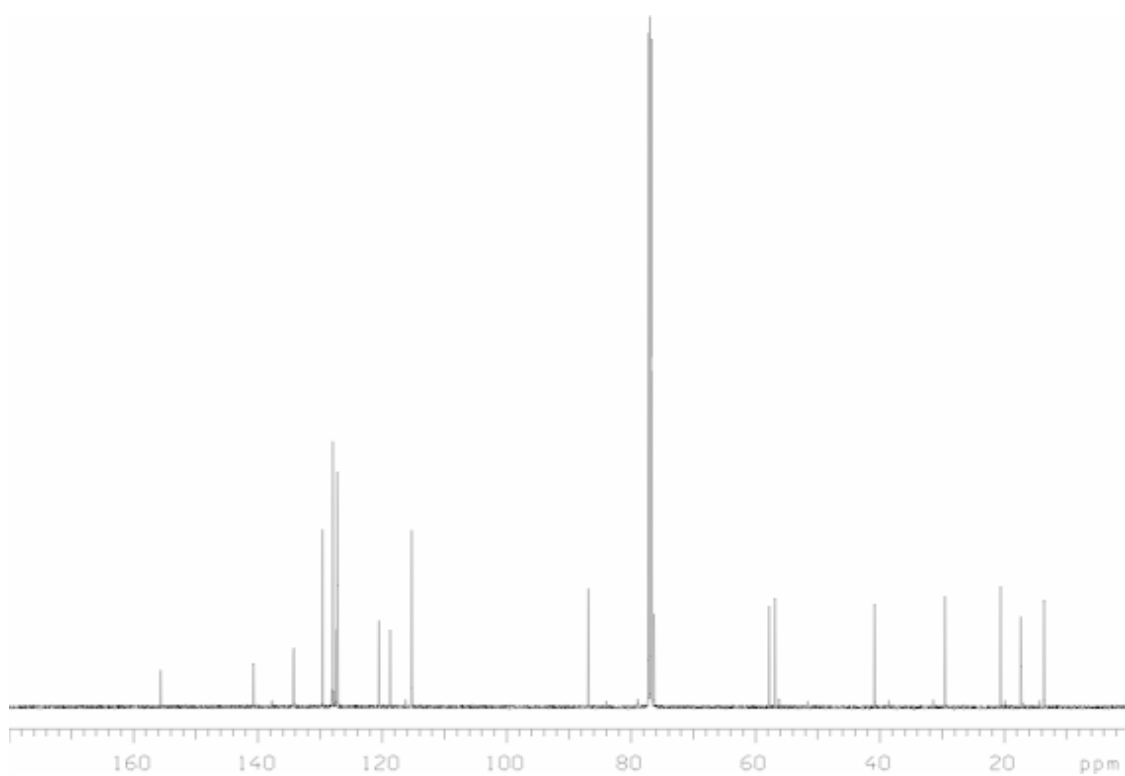

# Supplementary Material (ESI) for Chemical Communications  
# This journal is (c) The Royal Society of Chemistry 2006

**Entry 2, Table 1**  
**<sup>1</sup>H & <sup>13</sup>C Spectra**

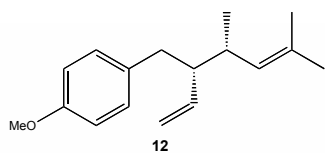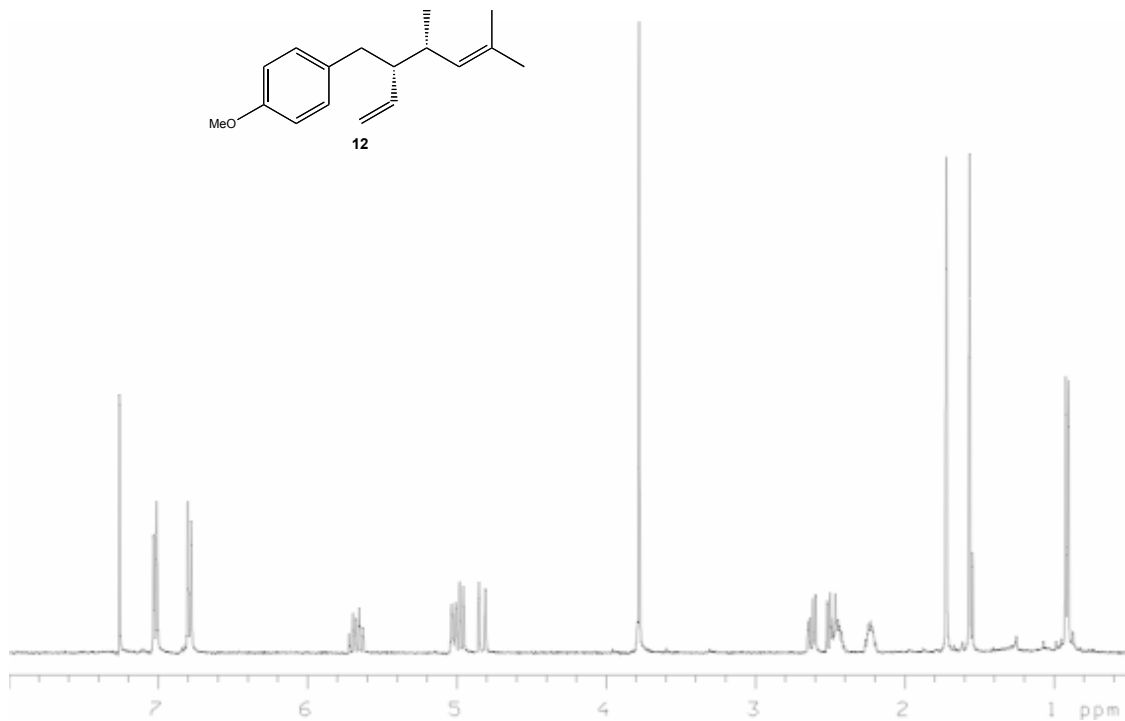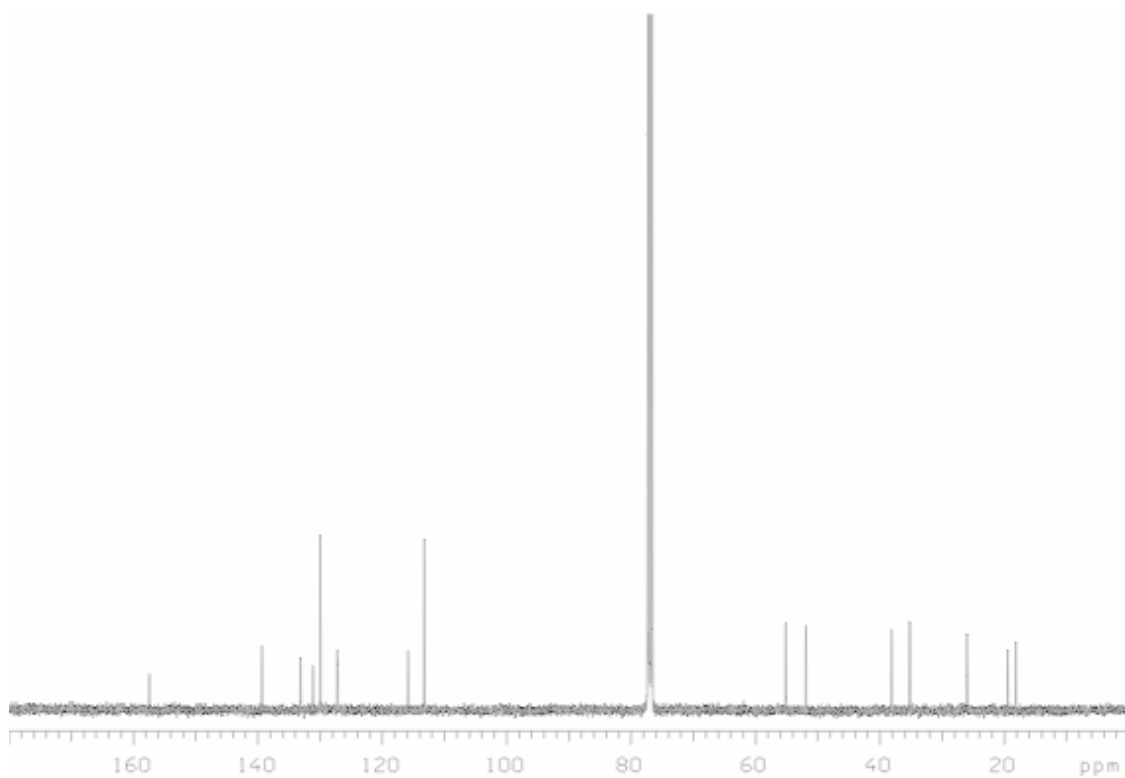

# Supplementary Material (ESI) for Chemical Communications  
# This journal is (c) The Royal Society of Chemistry 2006

**Entry 3, Table 1**  
**<sup>1</sup>H & <sup>13</sup>C Spectra**

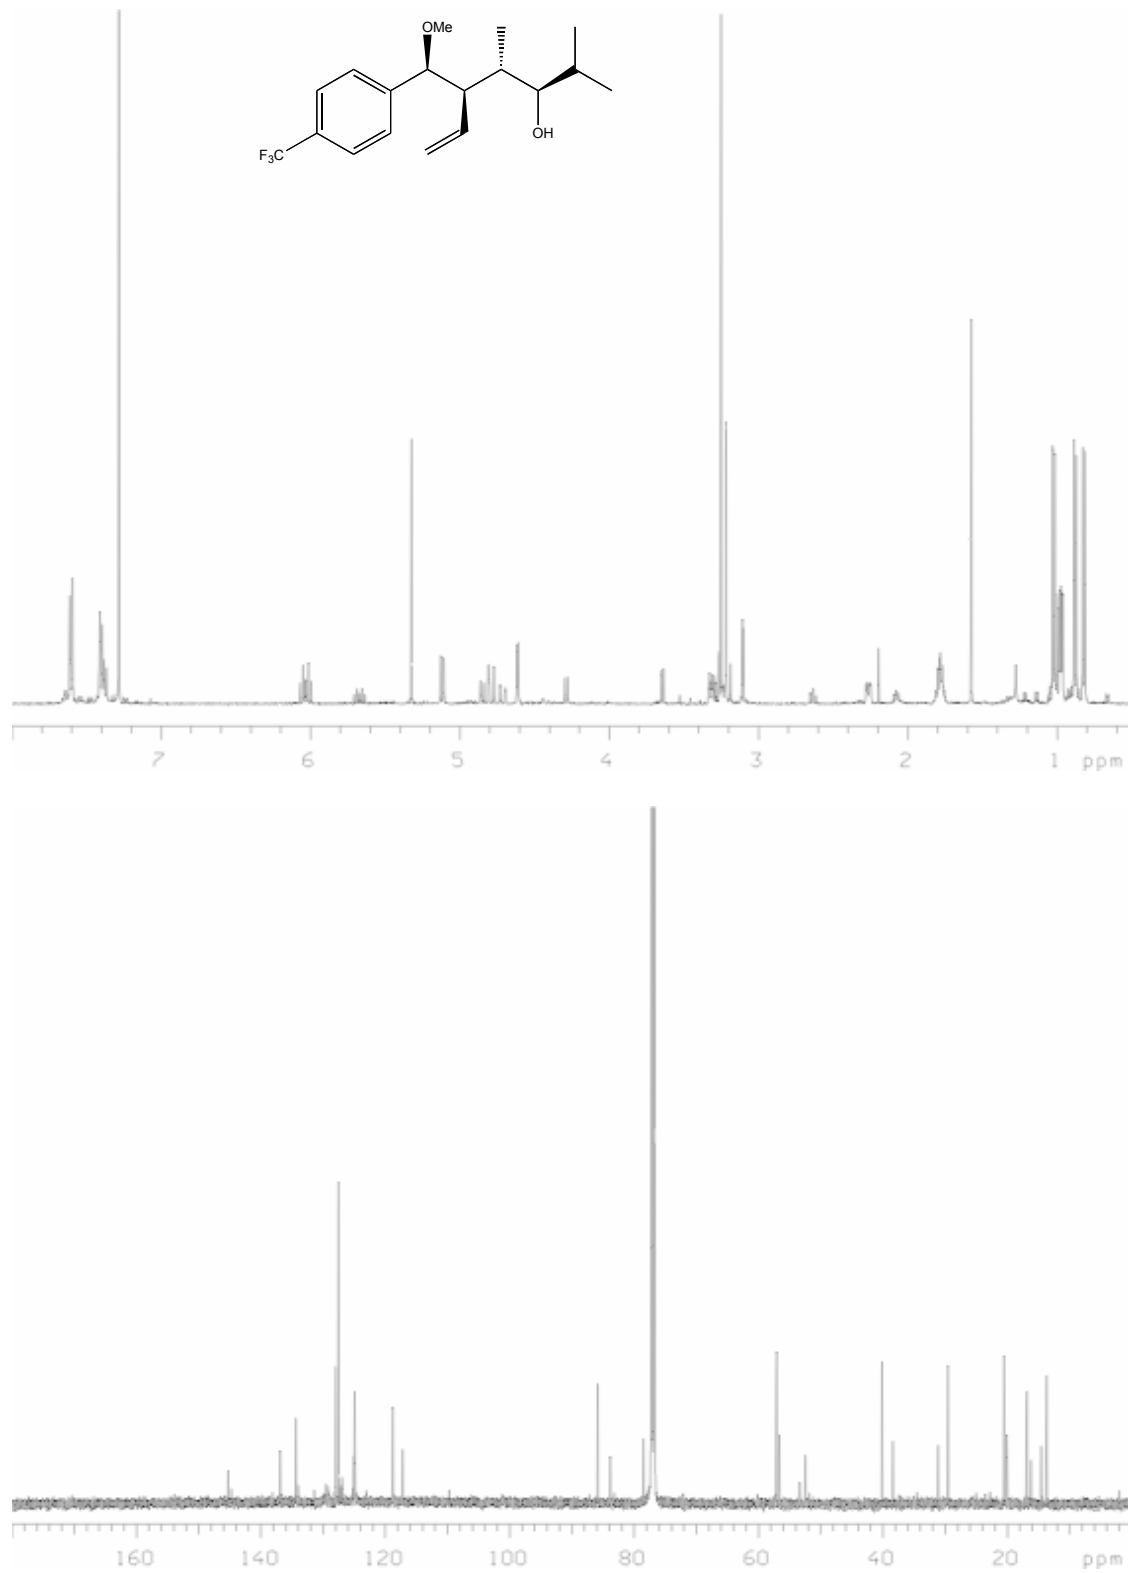

# Supplementary Material (ESI) for Chemical Communications  
# This journal is (c) The Royal Society of Chemistry 2006

**Entry 4, Table 1**  
 **$^1\text{H}$  &  $^{13}\text{C}$  Spectra**

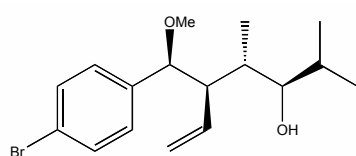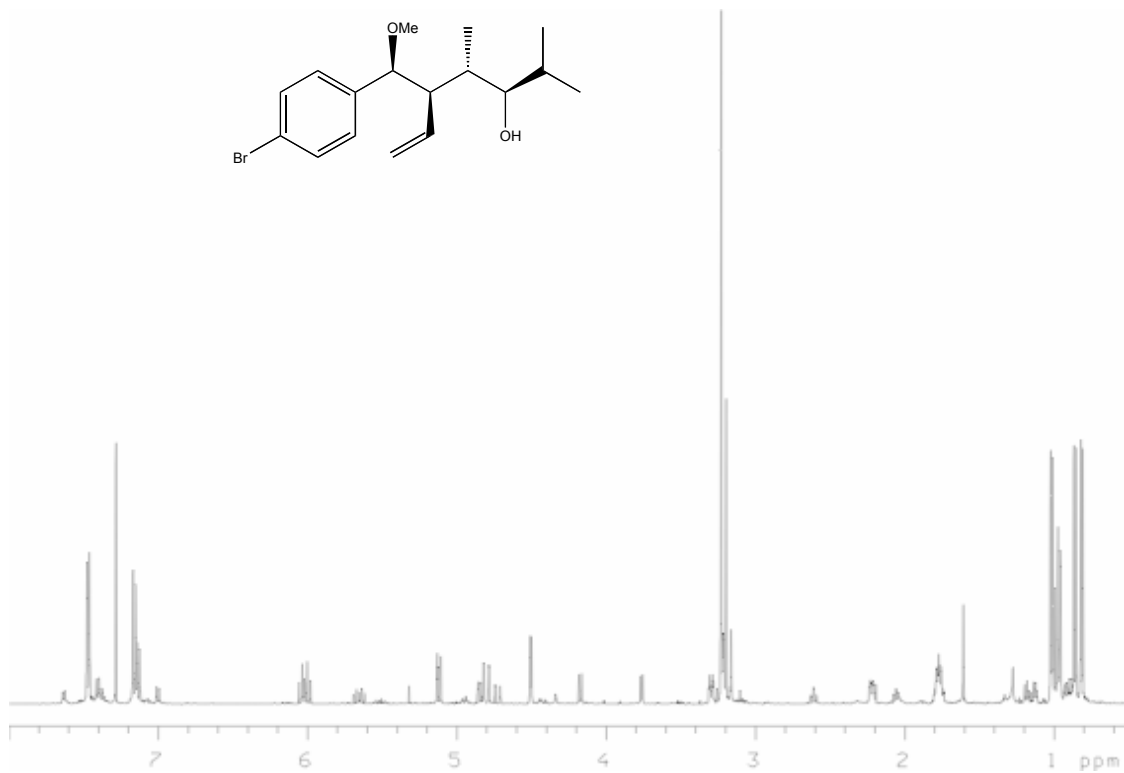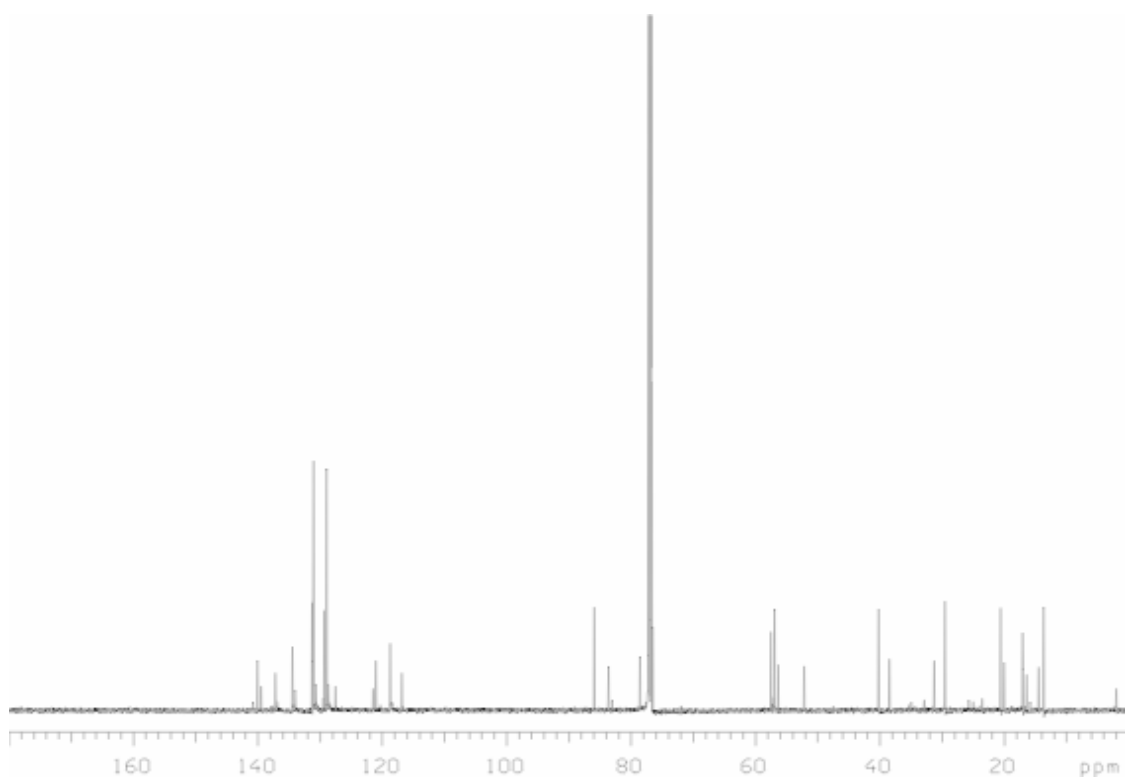

# Supplementary Material (ESI) for Chemical Communications  
# This journal is (c) The Royal Society of Chemistry 2006

**Entry 5, Table 1**  
 $^1\text{H}$  &  $^{13}\text{C}$  Spectra

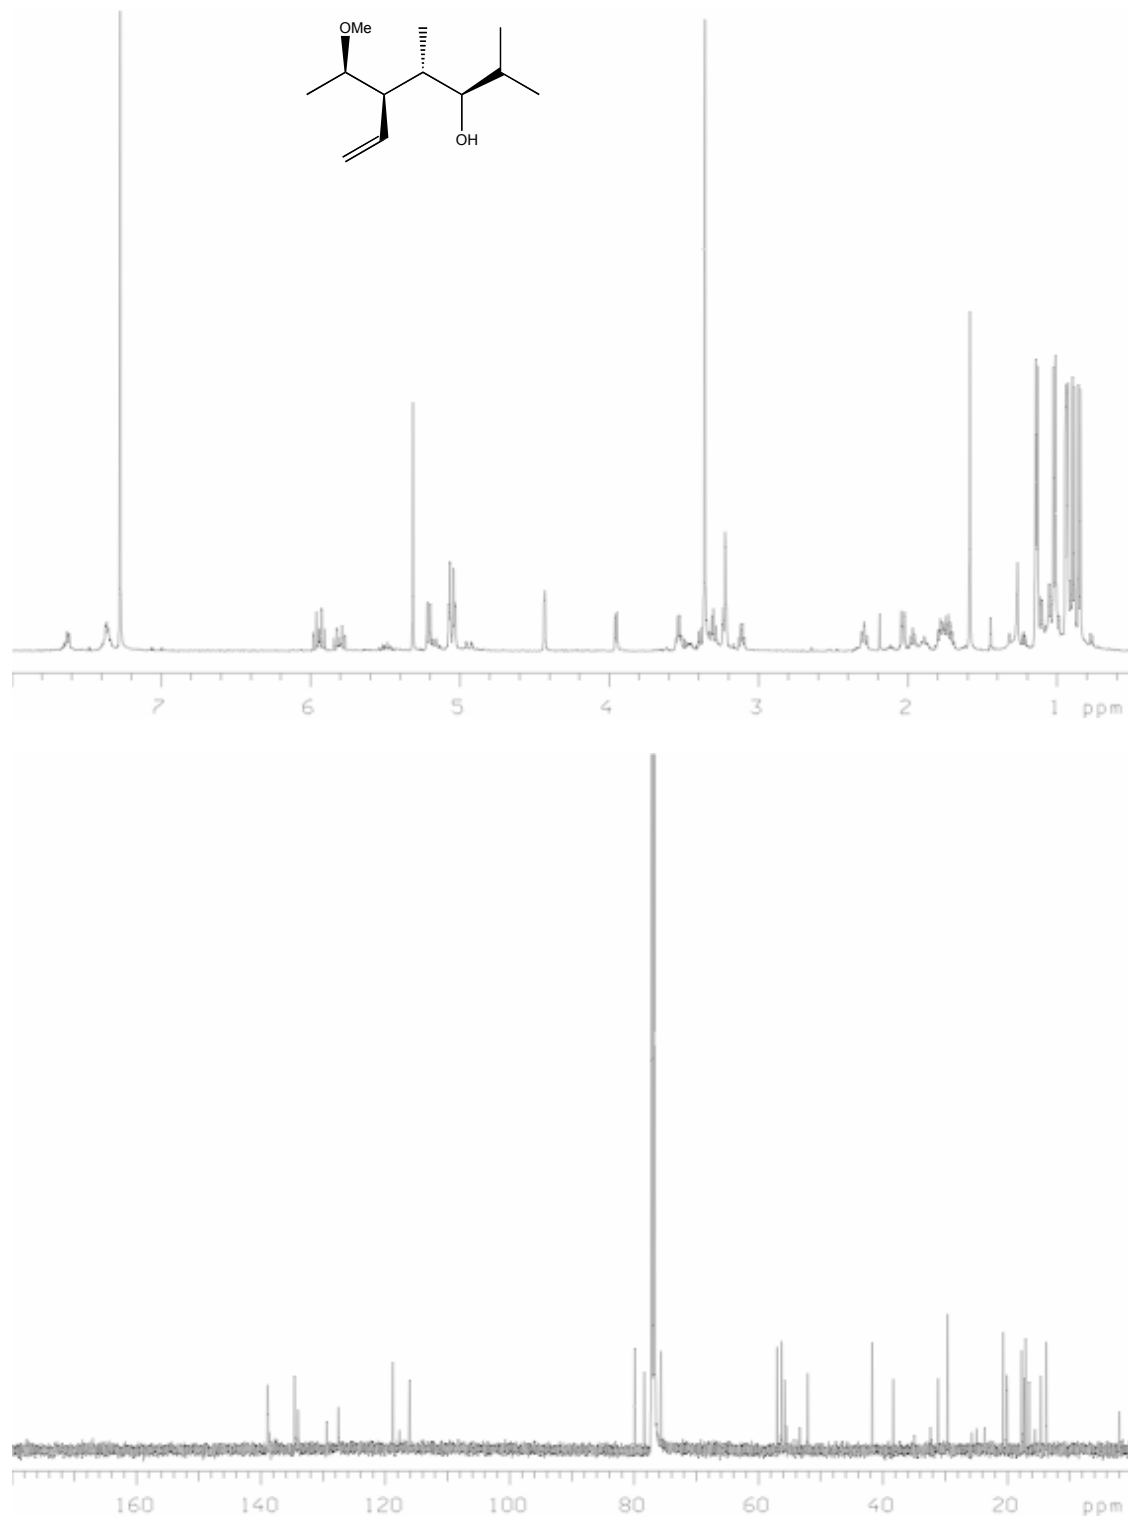

# Supplementary Material (ESI) for Chemical Communications  
# This journal is (c) The Royal Society of Chemistry 2006

**Entry 6, Table 1**  
**<sup>1</sup>H & <sup>13</sup>C Spectra**

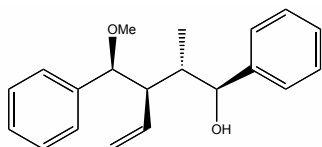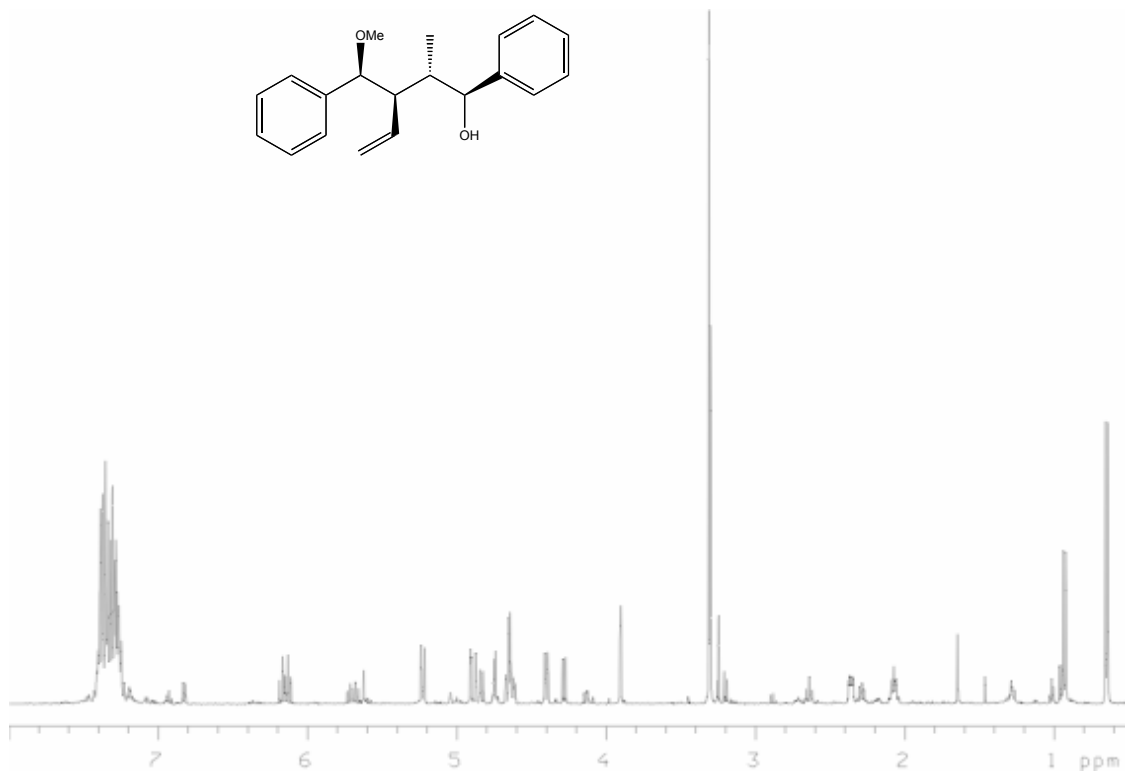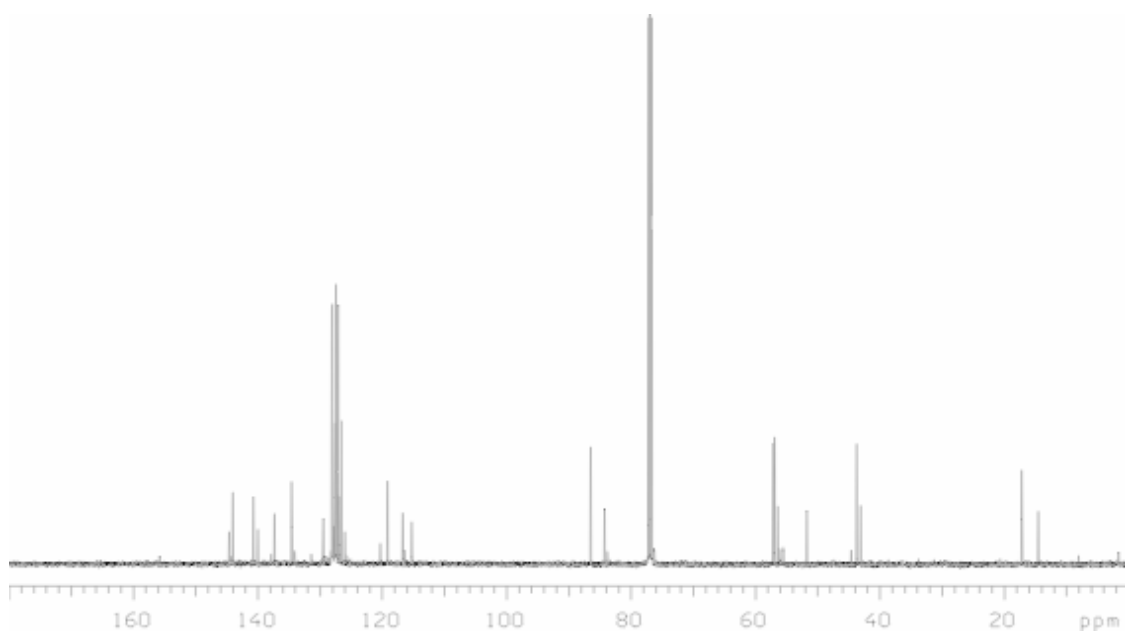

# Supplementary Material (ESI) for Chemical Communications  
# This journal is (c) The Royal Society of Chemistry 2006

**Entry 7, Table 1**  
**<sup>1</sup>H & <sup>13</sup>C Spectra**

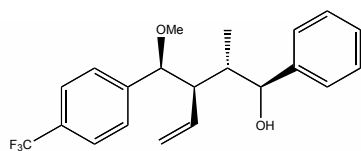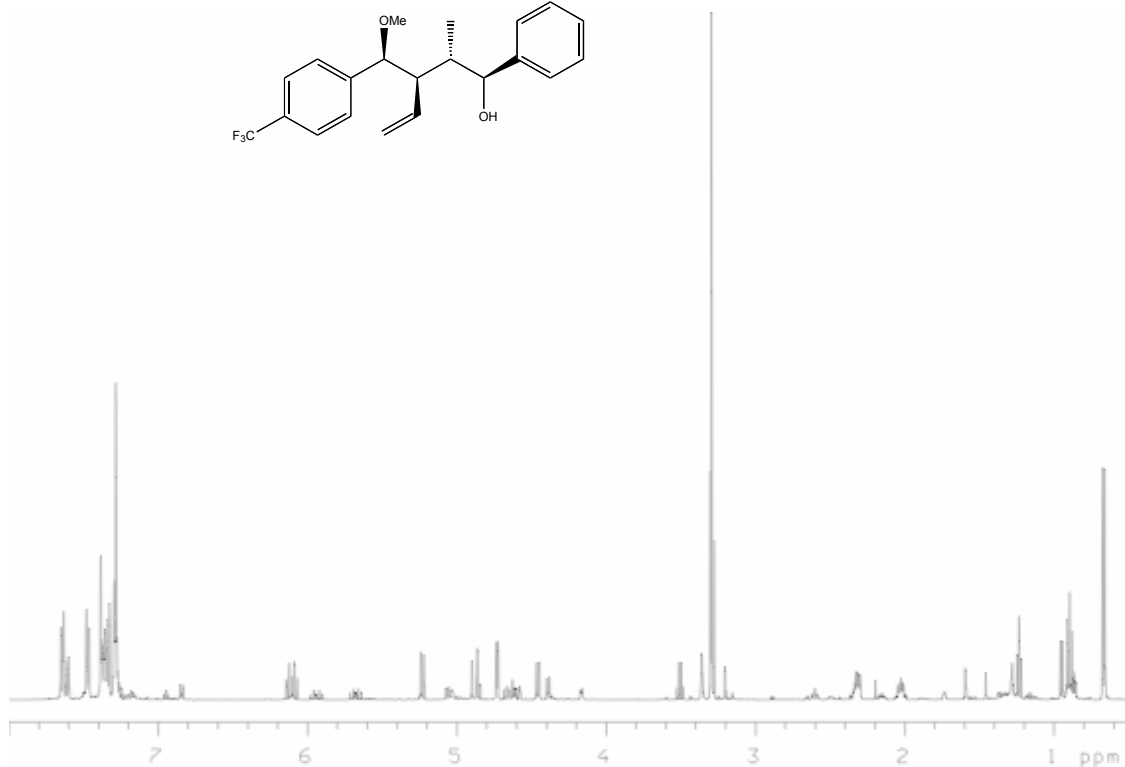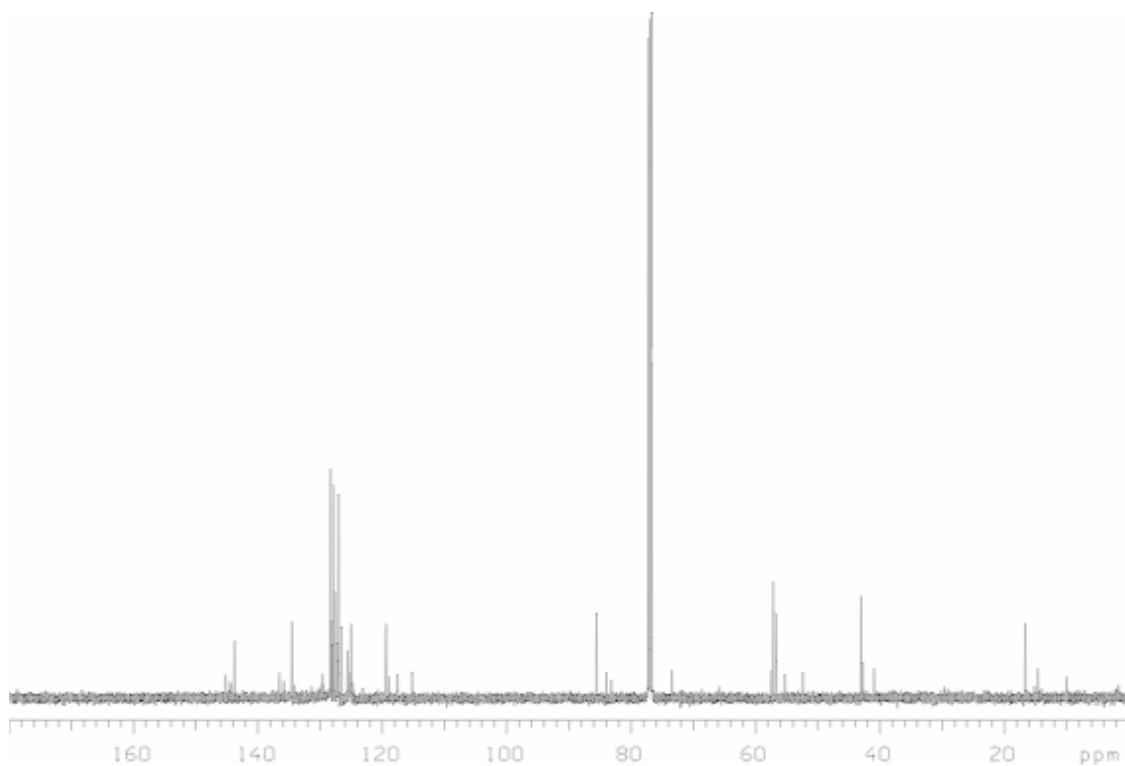



# Supplementary Material (ESI) for Chemical Communications  
# This journal is (c) The Royal Society of Chemistry 2006

**Entry 8, Table 1**  
 $^1\text{H}$  &  $^{13}\text{C}$  Spectra

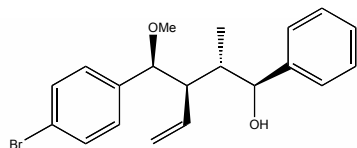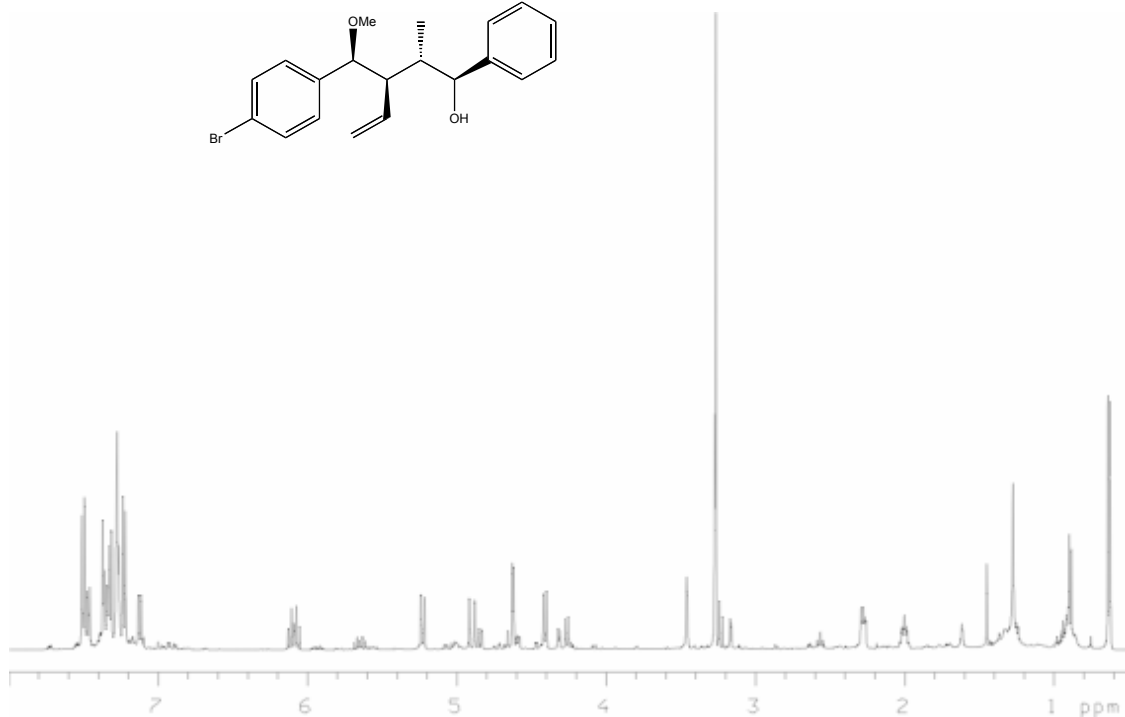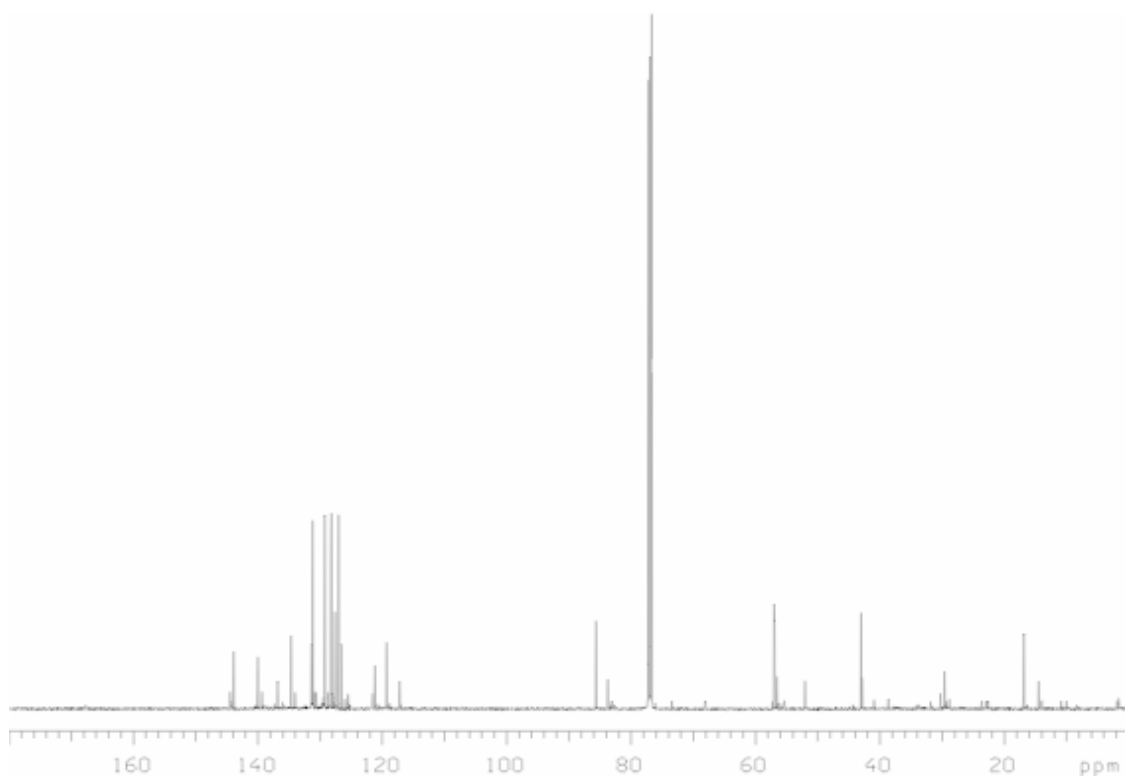

# Supplementary Material (ESI) for Chemical Communications  
# This journal is (c) The Royal Society of Chemistry 2006

**Entry 9, Table 1**  
 $^1\text{H}$  &  $^{13}\text{C}$  Spectra

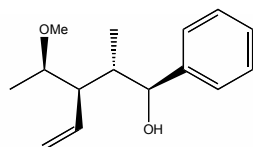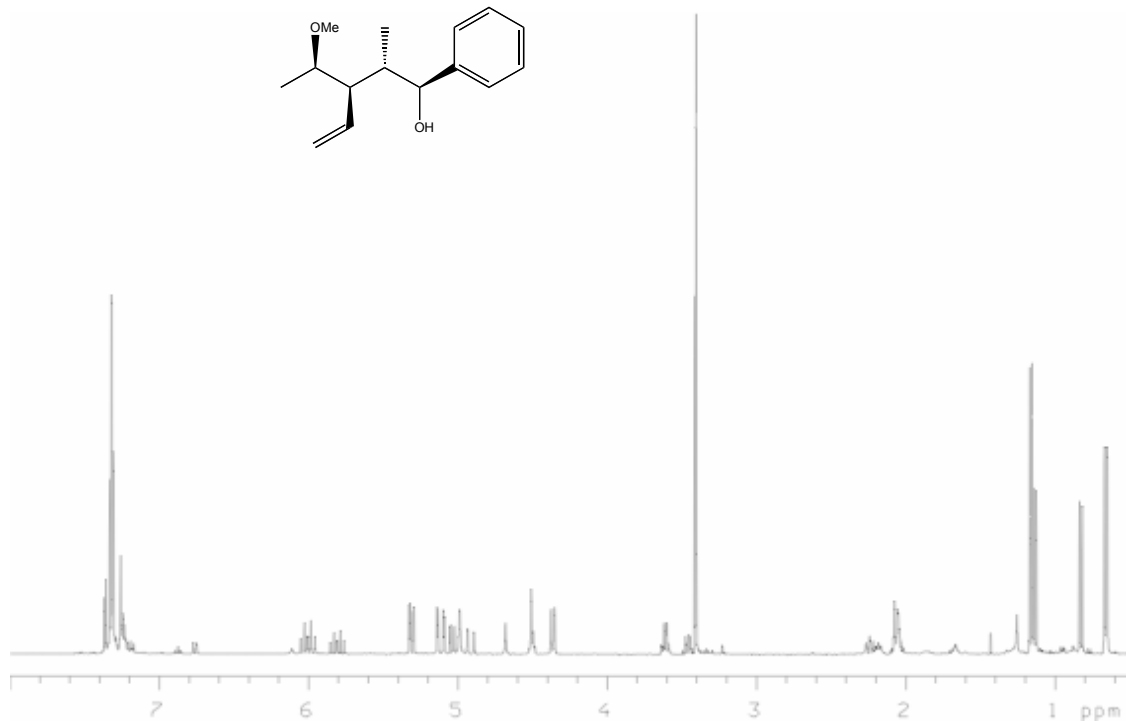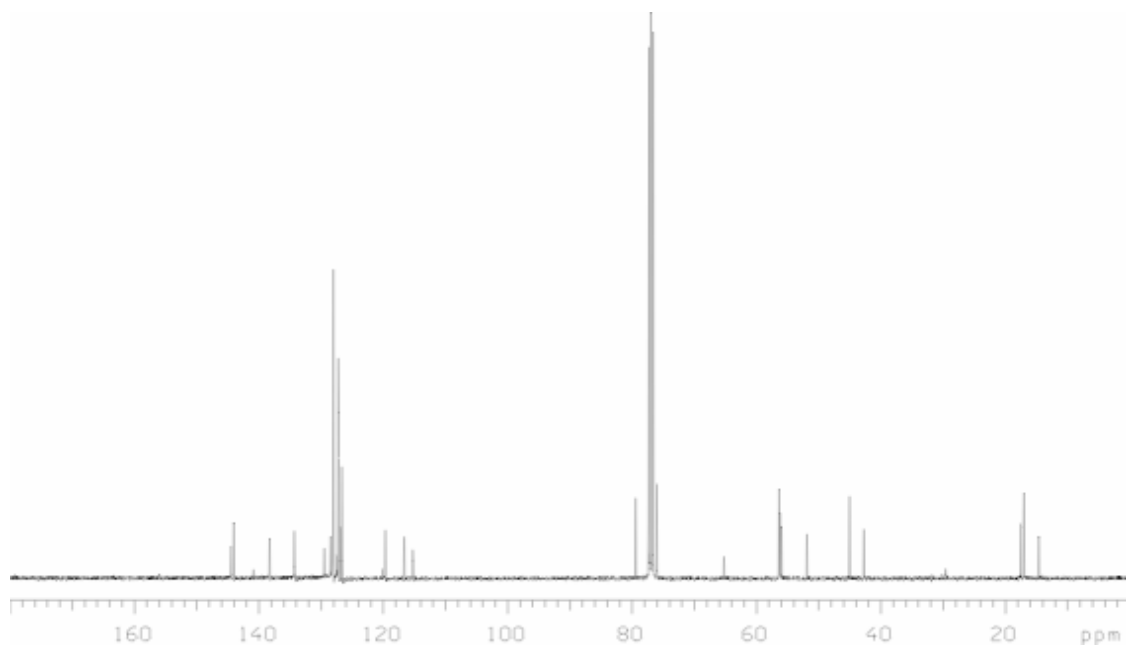

# Supplementary Material (ESI) for Chemical Communications  
# This journal is (c) The Royal Society of Chemistry 2006

**Entry 10, Table 1**  
 **$^1\text{H}$  &  $^{13}\text{C}$  Spectra**

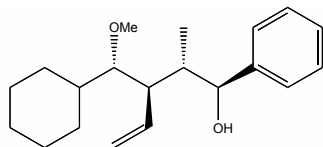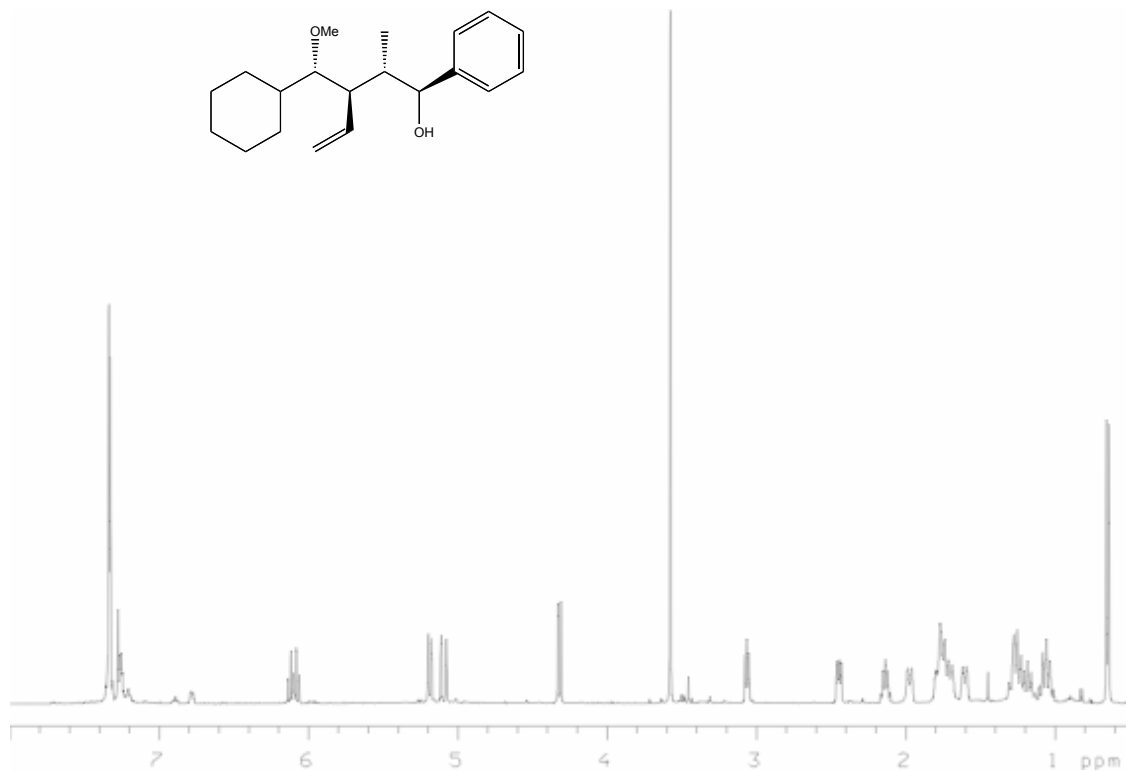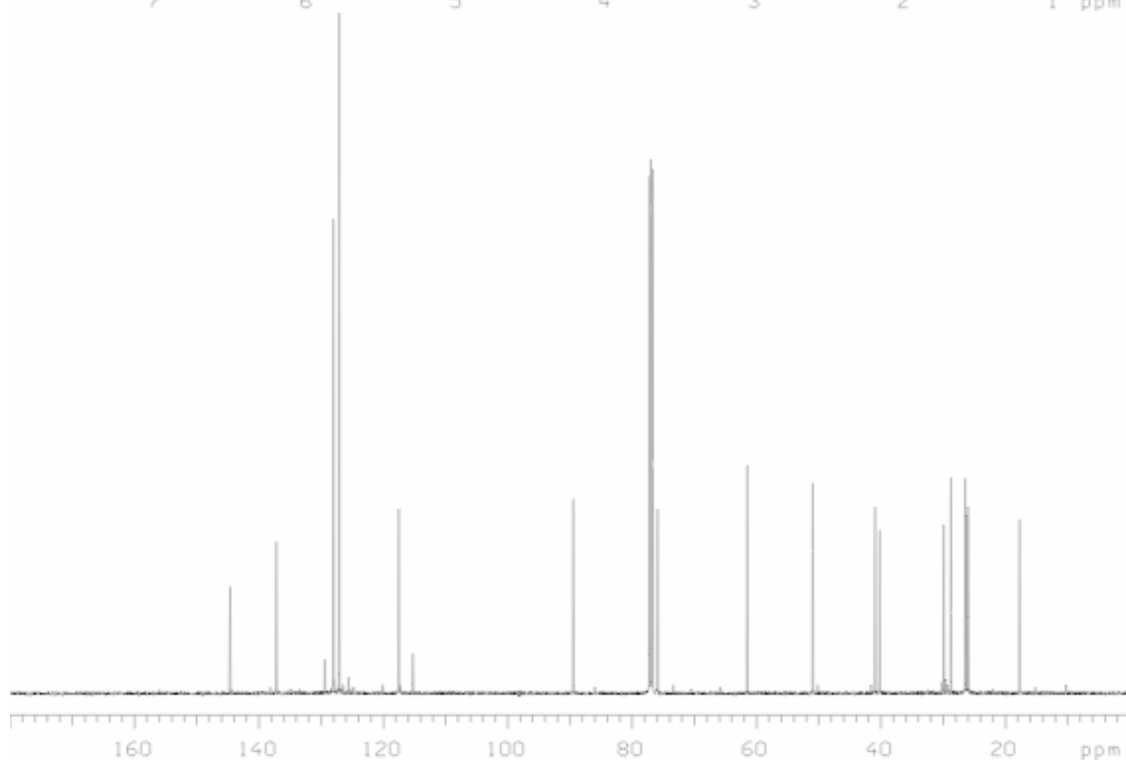

# Supplementary Material (ESI) for Chemical Communications  
# This journal is (c) The Royal Society of Chemistry 2006

**Entry 11, Table 1**  
 $^1\text{H}$  &  $^{13}\text{C}$  Spectra

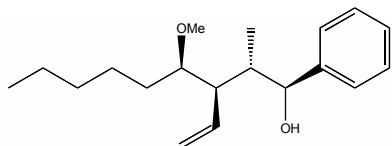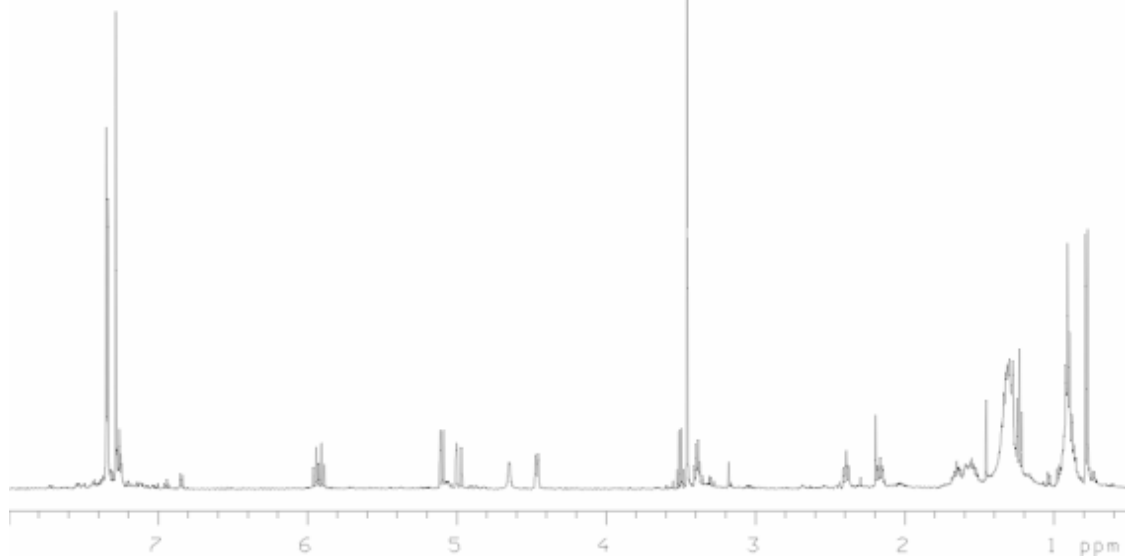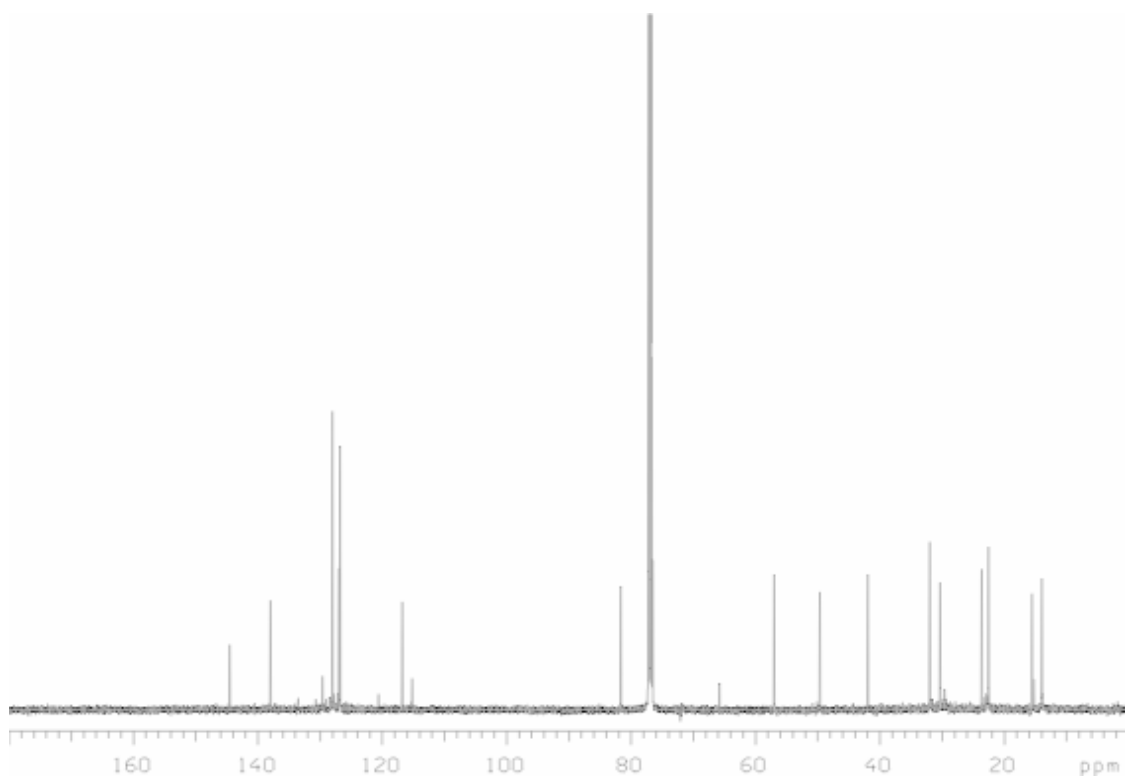

# Supplementary Material (ESI) for Chemical Communications  
# This journal is (c) The Royal Society of Chemistry 2006
